Articles of interest in other COB journals

From *Journal of Cell Science*

**Endogenous RhoG is dispensable for integrin-mediated cell spreading but contributes to Rac-independent migration**

Julia Meller, Luis Vidali and Martin Alexander Schwartz

Mellor, J. et al. 2008. *J. Cell Sci.* doi: 10.1242/jcs.025130

**Multiple domains of Stardust differentially mediate localisation of the Crumbs-Stardust complex during photoreceptor development in *Drosophila***

Natalia A. Bulgakova, Özlem Kempkens and Elisabeth Knust

Bulgakova, N. A. et al. 2008. *J. Cell Sci.* doi: 10.1242/jcs.031088
